# Supplementary material
Source: PubMed Central journal article supplement (PMC7883389)
Supplement: nl0c03850_si_001.pdf [file nl0c03850_si_001.pdf]

Supplementary Information for:  
Spatially controlled octahedral rotations and metal-insulator transitions in nickelate superlattices

Binbin Chen<sup>1</sup>, Nicolas Gauquelin<sup>2</sup>, Robert J. Green<sup>3,4</sup>, Jin Hong Lee<sup>5</sup>, Cinthia Piamonteze<sup>6</sup>, Matjaž Spreitzer<sup>7</sup>, Daen Jannis<sup>2</sup>, Johan Verbeeck<sup>2</sup>, Manuel Bibes<sup>5</sup>, Mark Huijben<sup>1</sup>, Guus Rijnders<sup>1</sup>, Gertjan Koster<sup>1\*</sup>

<sup>1</sup>*MESA+ Institute for Nanotechnology, University of Twente, 7500 AE Enschede, The Netherlands*

<sup>2</sup>*Electron Microscopy for Materials Science (EMAT), University of Antwerp, 2020 Antwerp, Belgium*

<sup>3</sup>*Department of Physics and Engineering Physics, University of Saskatchewan, 116 Science Pl, Saskatoon, Saskatchewan S7N 5E2, Canada*

<sup>4</sup>*Stewart Blusson Quantum Matter Institute, University of British Columbia, 111-2355 E Mall, Vancouver, British Columbia V6T 1Z4, Canada*

<sup>5</sup>*Unité Mixte de Physique, CNRS, Thales, Univ. Paris-Sud, Université Paris-Saclay, 91767 Palaiseau, France*

<sup>6</sup>*Swiss Light Source, Paul Scherrer Institute, 5232 Villigen PSI, Switzerland*

<sup>7</sup>*Advanced Materials Department, Jožef Stefan Institute, 1000 Ljubljana, Slovenia*

\*To whom correspondence should be addressed

E-mail: [g.koster@utwente.nl](mailto:g.koster@utwente.nl)

## **MATERIALS AND METHODS**

**Sample growth and characterization.** The pulsed laser depositions were conducted using a relatively high laser fluence of  $2 \text{ J/cm}^2$  to insure the right stoichiometry of  $\text{NdNiO}_3$ .<sup>1</sup> The oxygen pressure and repetition rate were fixed at 0.2 mbar and 2 Hz, respectively. The substrate temperature was kept at  $700 \text{ }^\circ\text{C}$ . After the deposition, the samples were in-situ annealed for 15 min to improve the crystallinity before cooling down to room temperature. The single terminated  $\text{NdGaO}_3$  substrates were obtained by chemical etching with buffered HF, followed by annealing at  $1050 \text{ }^\circ\text{C}$  for 2 hours in oxygen flow.<sup>2</sup> The X-ray diffractions were performed on PANalytical-X'Pert materials research diffractometer at the high-resolution mode. The surface morphology was characterized by atomic force microscopy. Transport properties were measured using a van der Pauw geometry on the Quantum Design physical property measurement system. The resistivities of the superlattices are calculated using the actual thickness of  $\text{NdNiO}_3$  since the growth at high oxygen pressure produces insulating  $\text{SrTiO}_3$  layers.

**Scanning transmission electron microscopy.** The characterization of the atomic structure was conducted using Cs-corrected scanning transmission electron microscopy high angle dark field imaging (STEM-HAADF) on the X-Ant-Em instrument at the University of Antwerp operated at 300kV, a convergence angle of 20 mrad and a collection angle of 44-190 mrad. The samples were cut along the orthorhombic [001] direction of  $\text{NdGaO}_3$  substrates using a FEI Helios 650 dual-beam Focused Ion Beam device. Chemical mapping was performed using electron energy loss spectroscopy (EELS) on a Gatan Quantum ERS spectrometer with a collection angle of 85 mrad, an exposure time of 80 ms/pixel and a  $0.5 \text{ eV/pixel}$  dispersion in dual EELS mode. Raw data

is presented after power-law background subtraction. Further details can also be found here<sup>3</sup>

**Resonant magnetic diffraction.** The resonant magnetic diffraction experiments were performed using an in-vacuum 4-circle diffractometer with chamber pressure below  $10^{-9}$  Torr at the resonant elastic and inelastic X-ray scattering beamline at Canadian light source in Saskatoon, Canada. The beamline has a flux of  $5 \times 10^{12}$  photon  $s^{-1}$  and energy resolution of  $10^{-4}$  eV. During the angular scan, the energy of the incident X-ray was set to 853.3 eV, which is at the Ni  $L_3$  maximum.

**X-ray absorption spectroscopy.** The XAS experiments were performed at the X-Treme beamline of the Swiss Light Source.<sup>4</sup> The data were collected using the total electron yield mode, with incoming X-ray at an angle of  $30^\circ$  from the sample surface. The spectra shown in Figure 4 were obtained by averaging four successive spectra measured with  $\pi$  and  $\sigma$  linear polarizations.

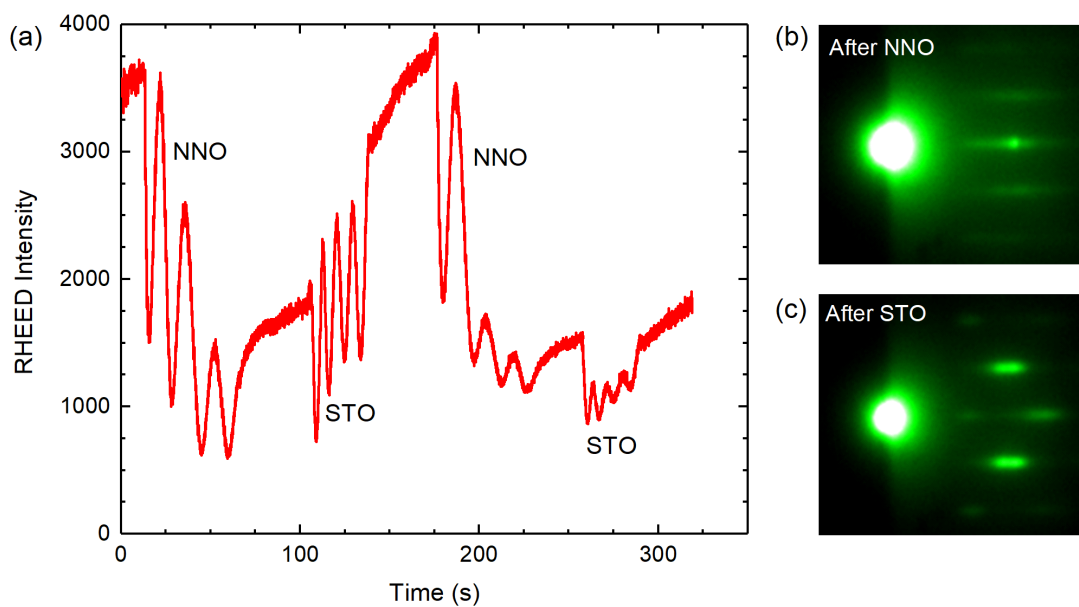

**Figure S1.** (a) Typical RHEED intensity profile recorded during the growth of NNO/STO SL with  $n = 4$ . The RHEED patterns taken after the last NNO and STO layers are shown in (b) and (c), respectively.

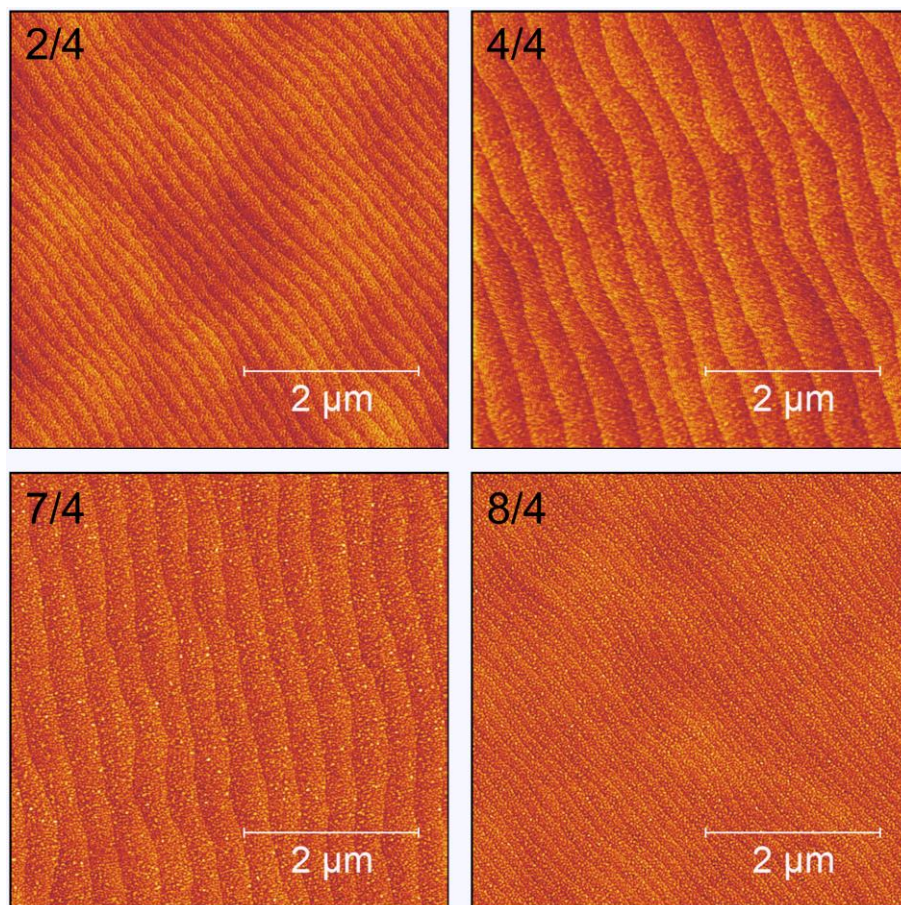

**Figure S2.** AFM images of the NNO/STO SLs with  $n = 2, 4, 7$  and  $8$ . The step-terrace surface confirms the high crystalline ordering of our samples.

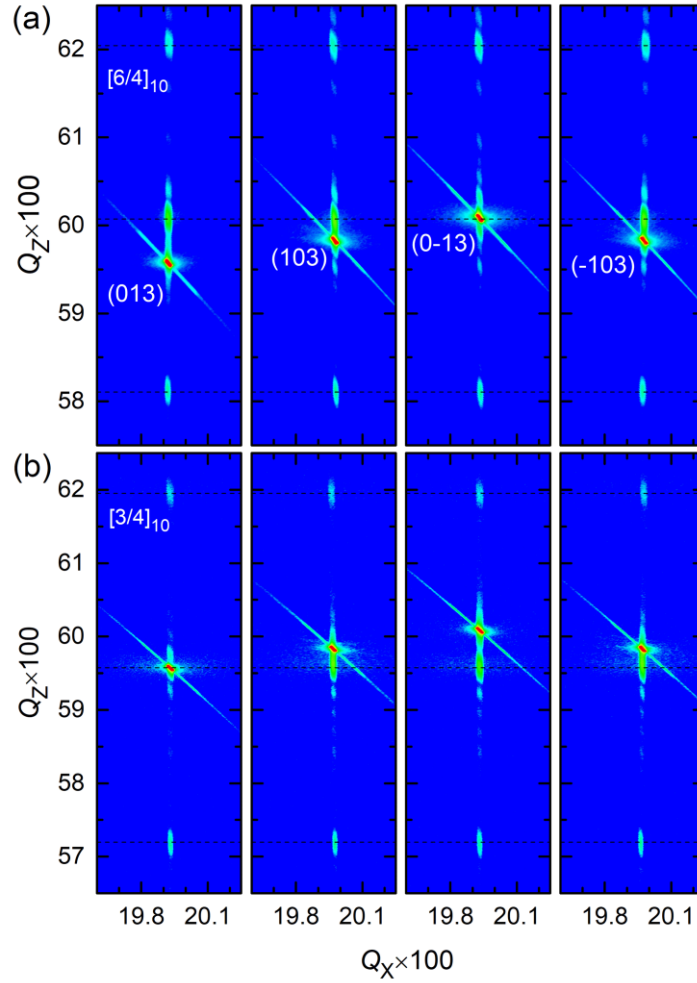

**Figure S3.** RSMs around pseudocubic (013), (103), (0-13), and (-103) reflections measured from the NNO/STO SLs with  $n = 6$  (a) and  $n = 3$  (b). Both SLs share the same  $Q_X$  value with the NGO substrates, indicative of their coherently strained state. The four reflections show the same  $Q_Z$  value for both SLs with  $n = 6$  and  $n = 3$ , attesting to their tetragonal symmetry.

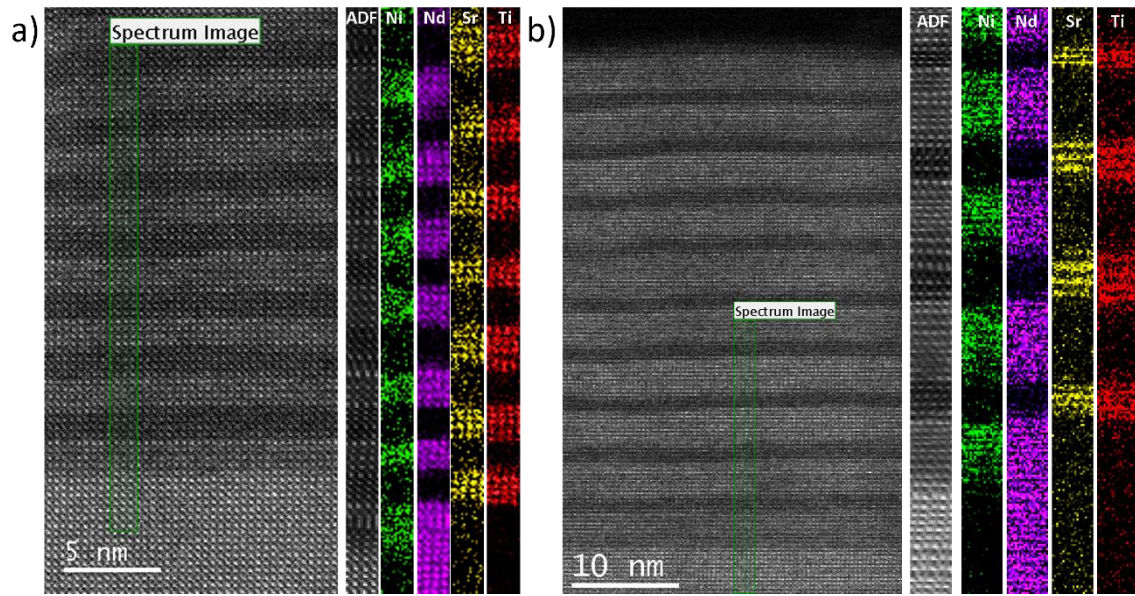

**Figure S4.** Low-magnification STEM images of NNO/STO SLs with  $n = 4$  (a) and  $n = 8$  (b). The atomically resolved EELS mappings of Ni (green), Nd (purple), Sr (yellow) and Ti (red) are shown on the right side, along with the annular dark field (ADF) images.



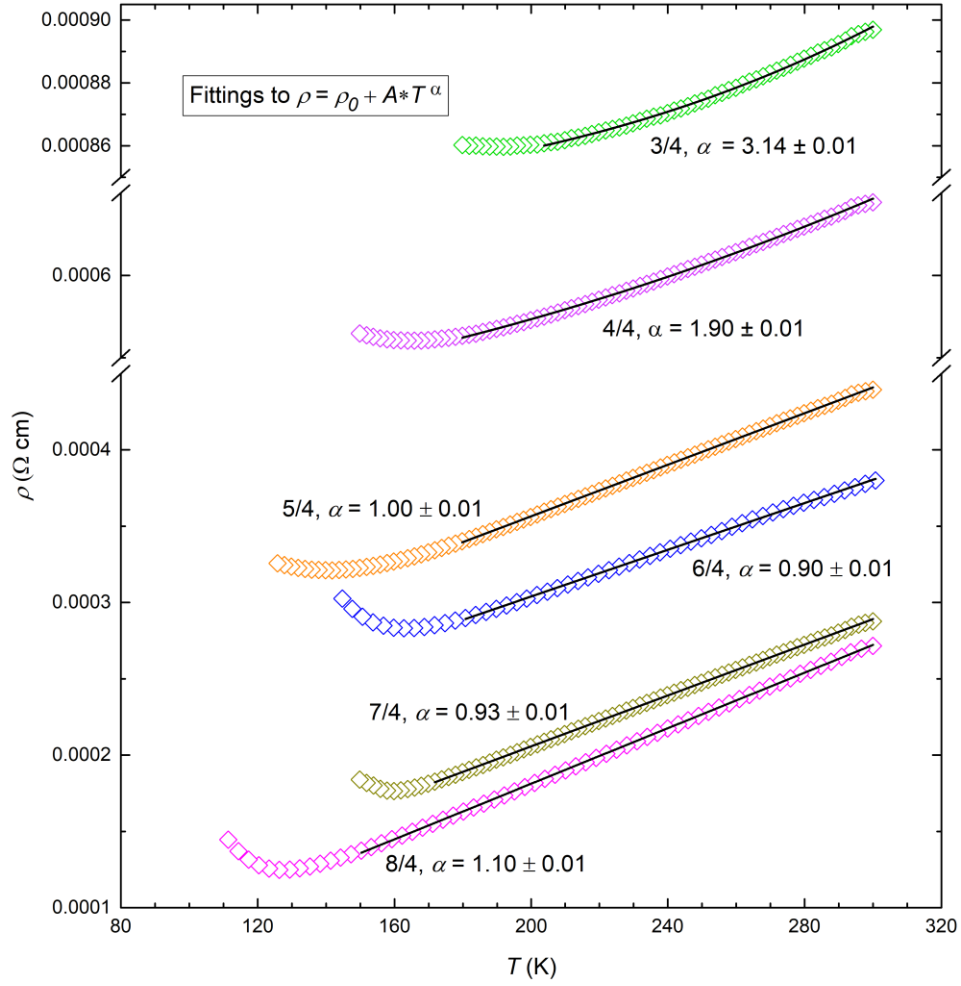

**Figure S5.** Fittings of the metallic resistivity for the SLs with  $n \geq 3$  to a power law  $\rho = \rho_0 + A * T^\alpha$ . The exponent  $\alpha$  is determined as described in Ref. 5.



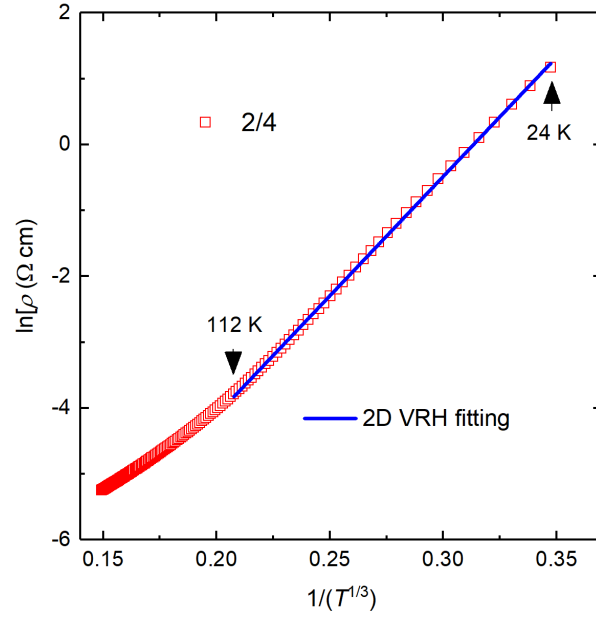

**Figure S6.** Fitting of the resistivity of the  $n = 2$  SL to the 2D-VRH mechanism,  $\rho = \rho_0 \exp[(T_0/T)^{1/3}]$ . Here  $T_0$  is derived as  $4.75 \times 10^4$  K. The mean hopping energy estimated by  $E_0 = 1/3 k_B T^{2/3} T_0^{1/3}$  is larger than  $k_B T$  in the fitting temperature range, validating the use of a 2D-VRH model.<sup>6</sup> Such a conduction mechanism can persist to relatively high temperature because of the possible polaron-assisted electron hopping.<sup>7</sup>

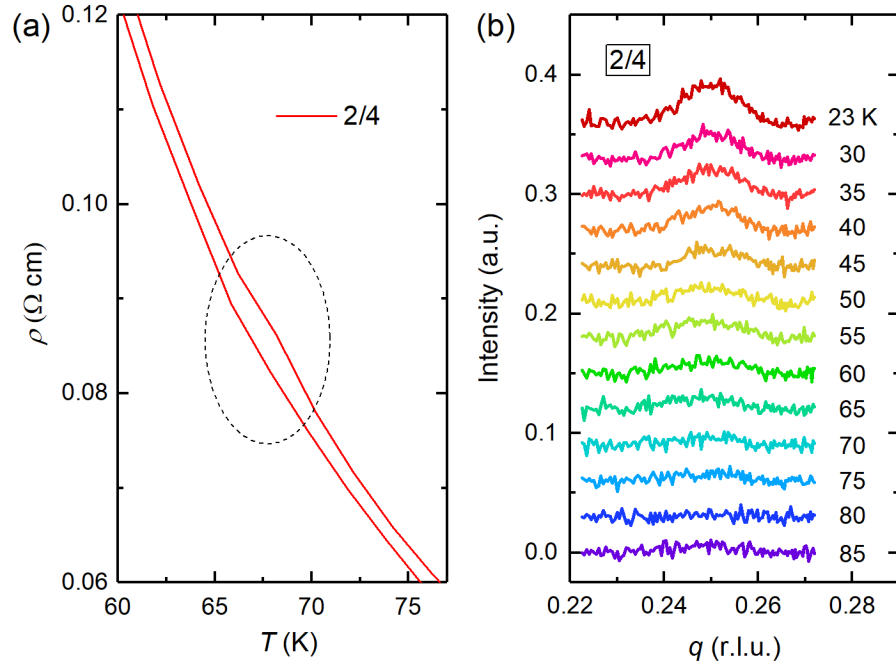

**Figure S7.** (a) Enlarged view of the temperature dependent resistivity curve for the  $n = 2$  SL to highlight the anomaly around  $\sim 68$  K. (b) Isothermal rocking curves around  $q = (\frac{1}{4}, \frac{1}{4})_{\text{pc}}$  reflection of the  $n = 2$  SL measured by x-ray resonant magnetic diffraction.

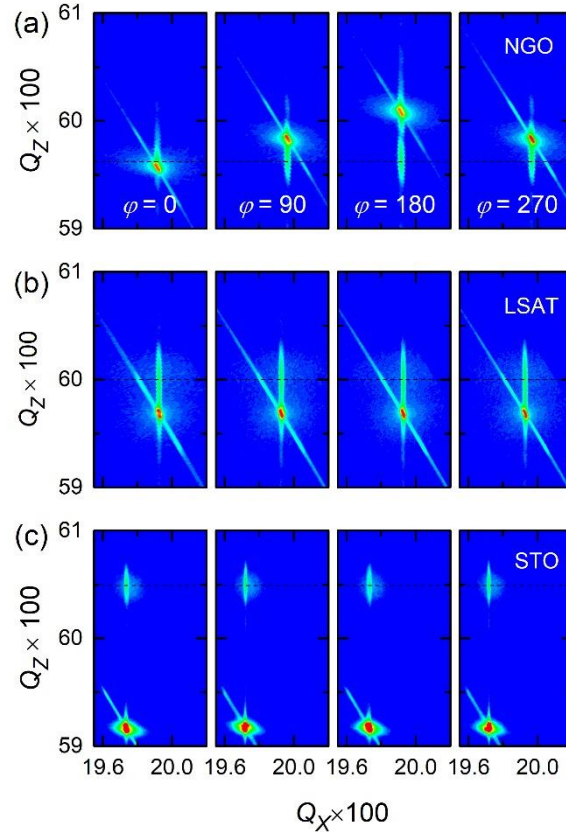

**Figure S8.** RSMs of the (103) reflection measured at four successive  $\varphi$  angles for the  $n = 5$  SLs grown on NGO (001)<sub>pc</sub> (a), LSAT (001) (b) and STO (001) (c).

#### References:

- (1) Breckenfeld, E.; Chen, Z.; Damodaran, A. R.; Martin, L. W. Effects of Nonequilibrium Growth, Nonstoichiometry, and Film Orientation on the Metal-to-Insulator Transition in NdNiO<sub>3</sub> Thin Films. *ACS Appl. Mater. Interfaces* **2014**, *6* (24), 22436–22444.
- (2) Leca, V.; Blank, D. H. A.; Rijnders, G. Termination Control of NdGaO<sub>3</sub> Crystal Surfaces by Selective Chemical Etching. arXiv:1202.2256v2 (2012).
- (3) J Wang, Y Shin, N Gauquelin, Y Yang, C Lee, D Jannis, J. Verbeeck, J.M. Rondinelli and S.J. May, Physical properties of epitaxial SrMnO<sub>2</sub>. 5- $\delta$  F  $\gamma$  oxyfluoride films, *Journal of Physics: Condensed Matter* **31** (36), 365602
- (4) Piamonteze, C.; Flechsig, U.; Rusponi, S.; Dreiser, J.; Heidler, J.; Schmidt, M.; Wetter, R.; Calvi, M.; Schmidt, T.; Pruchova, H.; Krempasky, J.; Quitmann, C.; Brune, H.; Nolting, F. X-Treme Beamline at SLS: X-ray Magnetic Circular and

Linear Dichroism at High Field and Low Temperature. *J. Synchrotron Radiat.* **2012**, *19*, 661–674.

- (5) Guo, Q.; Farokhipoor, S.; Magén, C.; Rivadulla, F.; Noheda, B. Tunable Resistivity Exponents in the Metallic Phase of Epitaxial Nickelates. *Nat. Commun.* **2020**, *11*, 2949.
- (6) Wei, H.; Jenderka, M.; Bonholzer, M.; Grundmann, M.; Lorenz, M. Modeling the Conductivity around the Dimensionality-Controlled Metal-Insulator Transition in  $\text{LaNiO}_3/\text{LaAlO}_3$  (100) Superlattices. *Appl. Phys. Lett.* **2015**, *106*, 042103.
- (7) Scherwitzl, R.; Gariglio, S.; Gabay, M.; Zubko, P.; Gibert, M.; Triscone, J.-M. Metal-Insulator Transition in Ultrathin  $\text{LaNiO}_3$  Films. *Phys. Rev. Lett.* **2011**, *106*, 246403.
